# Supplementary material for: Quantification of the Animal Tuberculosis Multi-Host Community Offers Insights for Control
Source: PubMed Central journal article supplement (PMC7350387; doi:10.3390/pathogens9060421), 2020-05-28
Supplement: pathogens-09-00421-s001.pdf [file pathogens-09-00421-s001.pdf]

## Supplementary Material

### Quantification of the animal tuberculosis multi-host community offers insights for control

Nuno Santos, Céline Richomme, Telmo Nunes, Joaquín Vicente, Paulo Célio Alves, José De la Fuente, Margarida Correia-Neves, María-Laura Boschioli, Richard Delahay, Christian Gortázar

Table S1. Summary of the prior distributions and supportive references for the sensitivity and specificity of the diagnostic tests.

Table S2. Summary of the posterior distributions of the true prevalence by host species in Britain and Ireland and supportive references.

Table S3. Summary of the posterior distributions of the abundance by host species in Britain and Ireland and supportive references.

Table S4. Summary of the posterior distributions of the number of infected animals by host species in Britain and Ireland.

Table S5. Summary of the posterior distributions of the true prevalence by host species in Central-Western Europe and supportive references.

Table S6. Summary of the posterior distributions of the abundance by host species in Central-Western Europe and supportive references.

Table S7. Summary of the posterior distributions of the number of infected animals by host species in Central-Western Europe.

Table S8. Summary of the posterior distributions of the true prevalence by host species in the Iberian Peninsula and supportive references.

Table S9. Summary of the posterior distributions of the abundance by host species in the Iberian Peninsula and supportive references.

Table S10. Summary of the posterior distributions of the number of infected animals by host species in the Iberian Peninsula.

| Host species | Diagnostic test                                       | Sensitivity                                 |                            |                                                           | Specificity                                 |                            |                                                           |
|--------------|-------------------------------------------------------|---------------------------------------------|----------------------------|-----------------------------------------------------------|---------------------------------------------|----------------------------|-----------------------------------------------------------|
|              |                                                       | Prior beta distribution ( $\alpha, \beta$ ) | Median (CI <sub>95</sub> ) | References (proportional weight if combination of priors) | Prior beta distribution ( $\alpha, \beta$ ) | Median (CI <sub>95</sub> ) | References (proportional weight if combination of priors) |
| Cattle       | SITT                                                  | 14.69673<br>7.269349                        | 0.674<br>(0.464-0.845)     | [28,54-56] - 0.25 weight each reference                   | 18.6233<br>3.290033                         | 0.861<br>(0.677-0.963)     | [28,54,56] - 0.33 weight each reference                   |
|              | SCITT                                                 | 16.84007<br>12.99837                        | 0.566<br>(0.387-0.734)     | [28,56,57] - 0.33                                         | 46.7429<br>1.885948                         | 0.967<br>(0.892-0.996)     | [28,56,57] - 0.33                                         |
| Goats        | SITT                                                  | 94<br>39                                    | 0.708<br>(0.627-0.781)     | [58]                                                      | 925<br>14                                   | 0.985<br>(0.976-0.992)     | [59]                                                      |
|              | SCITT                                                 | 12.17448<br>7.704688                        | 0.616<br>(0.395-0.808)     | [58,60] - 0.50                                            | 938<br>1                                    | 0.999<br>(0.996-1)         | [59]                                                      |
|              | Meat inspection - Bacteriological culture (in series) | 9.397363<br>8.010643                        | 0.545<br>(0.311-0.760)     | [17,61]                                                   | 482.424<br>1.48191                          | 0.998<br>(0.990-1)         | [17,62]                                                   |
| Sheep        | ELISA-Interferon $\gamma$ assay (in series)           | 6.114153<br>3.119444                        | 0.674<br>(0.348-0.910)     | [17]                                                      | 10.10635<br>2.068343                        | 0.848<br>(0.585-0.976)     | [17]                                                      |
|              | Meat inspection - Bacteriological culture (in series) | 9.397363<br>8.010643                        | 0.545<br>(0.311-0.760)     | [17,61]                                                   | 482.424<br>1.48191                          | 0.998<br>(0.990-1)         | [17,62]                                                   |
| Pigs         | ELISA                                                 | 158.2718<br>30.73391                        | 0.839<br>(0.782-0.886)     | [63]                                                      | 261.2776<br>5.232157                        | 0.982<br>(0.961-0.993)     | [63]                                                      |
|              | Meat inspection-Bacteriological culture (in series)   | 4.162443<br>3.188561                        | 0.573<br>(0.226-0.873)     | [64]                                                      | 999.9999<br>2.0000                          | 0.998<br>(0.995-1)         | [64]                                                      |
| Wild boar    | ELISA                                                 | 77<br>21                                    | 0.788<br>(0.700-0.861)     | [65]                                                      | 105<br>1                                    | 0.993<br>(0.966-1)         | [65]                                                      |
|              | Gross pathology                                       | 12.36278<br>3.682683                        | 0.782<br>(0.545-0.934)     | [66] - 0.70<br>[64] - 0.30                                | 91<br>1                                     | 0.992<br>(0.960-1)         | [64]                                                      |
|              | Bacteriological culture                               | 19<br>5                                     | 0.800<br>(0.611-0.926)     | [64]                                                      | 91<br>1                                     | 0.992<br>(0.961-1)         | [64]                                                      |
| Cervids      | Meat inspection                                       | 14.12171<br>8.873023                        | 0.618<br>(0.412-0.797)     | [67]                                                      | 1.740564<br>1.283729                        | 0.594<br>(0.099-0.966)     | [67]                                                      |
|              | Gross pathology                                       | 33.75777<br>8.935112                        | 0.795<br>(0.658-0.897)     | [67] - 0.70<br>[68] - 0.30                                | 13.24651<br>1.935955                        | 0.889<br>(0.671-0.984)     | [67] - 0.70<br>[68] - 0.30                                |
|              | Gross pathology – Bacteriological culture (in series) | 17.58386<br>12.61998                        | 0.584<br>(0.405-0.749)     | [67]                                                      | 15.88274<br>1.288249                        | 0.941<br>(0.766-0.996)     | [67]                                                      |
|              | Bacteriological culture                               | 97.74953<br>34.81664                        | 0.739<br>(0.660-0.808)     | [67]                                                      | 4.154772<br>1.087542                        | 0.831<br>(0.397-0.992)     | [67]                                                      |
|              | ELISA                                                 | 38<br>37                                    | 0.507<br>(0.374-0.639)     | [69]                                                      | 49<br>3                                     | 0.936<br>(0.846-0.982)     | [69]                                                      |
|              | SITT                                                  | 999.8444<br>215.8183                        | 0.823<br>(0.801-0.843)     | [67]                                                      | 999.9999<br>318.2055                        | 0.759<br>(0.735-0.781)     | [67]                                                      |
| Badger       | Bacteriological culture post-mortem standard          | 23.70861<br>19.88225                        | 0.545<br>(0.397-0.687)     | [70]                                                      | 999.9999<br>3.002004                        | 0.997<br>(0.993-0.999)     | [71,72] - 0.50                                            |
|              | Bacteriological culture post-mortem detailed          | 47.88388<br>7.212247                        | 0.874<br>(0.769-0.944)     | [73]                                                      | 999.9999<br>3.002004                        | 0.997<br>(0.993-0.999)     | [71,72] - 0.50                                            |

SITT – single intradermal tuberculin test

SCITT – single comparative intradermal tuberculin test

ELISA – enzyme-linked immunosorbent assay

Gross pathology – detailed *post-mortem* inspection to detect macroscopic lesions

Meat inspection – standard *post-mortem* inspection to detect macroscopic lesions, performed in slaughterhouse or in the field

**Table S1.** Summary of the prior distributions and supportive references for the sensitivity and specificity of the diagnostic tests. No data available on the specificity of small ruminant meat inspection – assumed the specificity of cattle slaughterhouse inspection [62]. No data available on the sensitivity and specificity of pig meat inspection – assumed the sensitivity and specificity of gross pathology in wild boar [64]. No data available on the specificity of badger post-mortem bacteriological culture – assumed the specificity of badger ante-mortem bacteriological culture [71,72].

| Host species     | Regionalization                  | Country                               | Diagnostic test<br>(proportional weight if combination of priors) | True prevalence                                     |                                 |                            | References |
|------------------|----------------------------------|---------------------------------------|-------------------------------------------------------------------|-----------------------------------------------------|---------------------------------|----------------------------|------------|
|                  |                                  |                                       |                                                                   | Median                                              | Credible Interval <sup>95</sup> | Brooks-Gelman-Rubin test   |            |
| Cattle           | Scotland                         | United Kingdom                        | SCITT                                                             | 9.634635e-5                                         | 4.157268e-6<br>0.0003184139     | 1.0001                     | [74]       |
|                  | England, Wales, Northern Ireland |                                       | SCITT                                                             | 0.002290942                                         | 9.643742e-5<br>0.007447301      | 1.0181<br>( <sup>1</sup> ) | [75]       |
|                  | n.a.                             | Republic of Ireland                   | SCITT                                                             | 0.001286101                                         | 5.211055e-5<br>0.004153798      | 1.0041<br>( <sup>1</sup> ) |            |
| Goat             | n.a.                             | United Kingdom<br>Republic of Ireland | Meat inspection –<br>Bacteriological culture<br>(in series)       | 0.000125141                                         | 4.879438e-6<br>0.0006586857     | 1.0002                     | [75,77]    |
| Sheep            | n.a.                             | United Kingdom<br>Republic of Ireland | Meat inspection –<br>Bacteriological culture<br>(in series)       | 1.380585e-7                                         | 5.198041e-9<br>7.393829e-7      | 1.0001                     |            |
| Pig              | n.a.                             | United Kingdom<br>Republic of Ireland | Meat inspection -<br>Bacteriological culture<br>(in series)       | 9.987239e-7                                         | 4.113228e-8<br>5.269530e-6      | 1.0000                     |            |
| Cervids (farmed) | n.a.                             | United Kingdom<br>Republic of Ireland | SITT                                                              | 0.001560901                                         | 5.757917e-5<br>0.008233292      | 1.0000                     | [76]       |
| Wild boar        | n.a.                             | United Kingdom                        | Bacteriological culture                                           | 0.03757993                                          | 0.004697831<br>0.09193747       | 1.0002                     | [78,79]    |
| Red deer         | Scotland                         | United Kingdom                        | n.a.                                                              | 0                                                   | n.a.                            | n.a.                       | [80,81]    |
|                  | England, Wales, Northern Ireland |                                       | Bacteriological culture                                           | 0.008246421                                         | 0.0003860000<br>0.02949672      | 1.0001                     |            |
|                  | n.a.                             | Republic of Ireland                   |                                                                   |                                                     |                                 |                            |            |
| Fallow deer      | Scotland                         | United Kingdom                        | n.a.                                                              | 0                                                   | n.a.                            | n.a.                       |            |
|                  | England, Wales, Northern Ireland |                                       | Bacteriological culture                                           | 0.04262090                                          | 0.002170639<br>0.09164222       | 1.0004                     |            |
|                  | n.a.                             | Republic of Ireland                   |                                                                   |                                                     |                                 |                            |            |
| Badger           | Scotland <sup>(2)</sup>          | United Kingdom                        | n.a.                                                              | 0                                                   | n.a.                            | n.a.                       | [82]       |
|                  | Endemic regions <sup>(3)</sup>   |                                       | Bacteriological culture <i>post-mortem</i> detailed (0.33)        | 0.2201824                                           | 0.1664002<br>0.2865286          | 1.0001                     |            |
|                  |                                  |                                       | Bacteriological culture <i>post-mortem</i> detailed (0.33)        | 0.1738025                                           | 0.1461464<br>0.2087118          | 1.0000                     | [83]       |
|                  |                                  |                                       | Bacteriological culture <i>post-mortem</i> detailed (0.33)        | 0.2478713                                           | 0.1599084<br>0.3579990          | 1.0000                     | [84]       |
|                  |                                  |                                       | Combined                                                          | 0.207                                               | 0.151<br>0.327                  |                            |            |
|                  |                                  |                                       | Non-endemic regions <sup>(4)</sup>                                | Bacteriological culture <i>post-mortem</i> detailed | 0.04643781                      | 0.01391974<br>0.1042301    | 1.0001     |
|                  | n.a.                             | Republic of Ireland                   | Bacteriological culture <i>post-mortem</i> detailed               | 0.1270293                                           | 0.1124526<br>0.1474287          | 1.0000                     | [85]       |

(1) 1,000,000 iterations with 1,000,000 as burnin

(2) Not detected – Null prevalence assumed

(3) Wales, Northern Ireland and the following regions of England: Southwest and West Midlands

(4) The remainder of England

n.a. – not applicable

**Table S2.** Summary of the posterior distributions of the true prevalence by host species in Britain and Ireland and supporting references. Goat, sheep and pig TB prevalence based on the number of infected animals identified by abattoir surveillance [76,77]. TB prevalence in farmed cervids based on the number animals undergoing intradermal tuberculin tests (test assumed to be SITT) [76]. TB prevalence in badgers in the high-risk areas based on passive surveillance of road traffic accidents in the high-incidence counties of Wales from 2005-2006 [82], in Northern Ireland from 1998-2011 [83] and in the county of Cheshire in England [84]. In the low-risk area from passive surveillance of road traffic accidents in the low-incidence counties of Wales from 2005-2006 [82].

| Host species     | Regionalization                  | Country             | Host population      |         |                                 |            |
|------------------|----------------------------------|---------------------|----------------------|---------|---------------------------------|------------|
|                  |                                  |                     | Exact                | Median  | Credible Interval <sup>95</sup> | References |
| Cattle           | Scotland                         | United Kingdom      | 1,694,411            |         |                                 | [86]       |
|                  | England, Wales, Northern Ireland |                     | 8,092,589            |         |                                 |            |
|                  | n.a.                             | Republic of Ireland | 7,363,500            |         |                                 |            |
| Goat             | n.a.                             | United Kingdom      | 105,000              |         |                                 | [77]       |
|                  |                                  | Republic of Ireland | 9,860 <sup>(1)</sup> |         |                                 |            |
| Sheep            | n.a.                             | United Kingdom      | 23,239,000           |         |                                 |            |
|                  |                                  | Republic of Ireland | 3,981,810            |         |                                 |            |
| Pig              | n.a.                             | United Kingdom      | 4,713,000            |         |                                 |            |
|                  |                                  | Republic of Ireland | 1,616,360            |         |                                 |            |
| Cervids (farmed) | n.a.                             | United Kingdom      | 27,000               |         |                                 | [67]       |
|                  |                                  | Republic of Ireland | 20,000               |         |                                 | [87,88]    |
| Wild boar        | n.a.                             | United Kingdom      |                      | 2,000   | 647 – 5,835                     | [89,90]    |
| Red deer         | Scotland                         | United Kingdom      |                      | 439,895 | 253,107 – 686,560               | [89-92]    |
|                  | England, Wales, Northern Ireland |                     |                      | 11,279  | 6,490 – 17,604                  |            |
|                  | n.a.                             | Republic of Ireland |                      | 3,009   | 1,832 – 4,626                   | [92]       |
| Fallow deer      | Scotland                         | United Kingdom      |                      | 19,536  | 14,356 – 25,382                 | [90,91]    |
|                  | England, Wales, Northern Ireland |                     |                      | 244,464 | 179,644 – 317,618               |            |
|                  | n.a.                             | Republic of Ireland |                      | 8,374   | 5,108 – 12,804                  | [22,91-93] |
| Badger           | Scotland                         | United Kingdom      |                      | 42,820  | 26,280 – 59,360                 | [96,97]    |
|                  | Endemic regions                  |                     |                      | 354,259 | 304,642 – 404,198               | [22,94-95] |
|                  | Non-endemic regions              |                     |                      | 164,900 | 132,940 – 197,540               | [22,95]    |
|                  | n.a.                             | Republic of Ireland |                      | 83,832  | 75,597 – 91,866                 | [98]       |

<sup>(1)</sup> 2015 estimate

n.a. – not applicable

**Table S3.** Summary of the posterior distributions of the abundance by host species in Britain and Ireland and supporting references. Deer population in Scotland: estimated deer population in the UK [89,90] multiplied by the proportion of the UK deer population in Scotland [91]. Badger population in the high-risk area of the UK: badger population in Northern Ireland [94] + badger population in England and Wales [94], multiplied by the proportion of setts in high-risk regions [96]. Badger population in the low-risk area of the UK: badger population in England and Wales [94], multiplied by the proportion of setts in low-risk regions [96]. Badger population in Scotland: number of setts in Scotland [97] multiplied by the average size of badger social groups in Scotland [98].

| Host species     | Regionalization                  | Country             | Infected hosts |                                 |                 |
|------------------|----------------------------------|---------------------|----------------|---------------------------------|-----------------|
|                  |                                  |                     | Median         | Credible Interval <sup>95</sup> | Geweke test (p) |
| Cattle           | Scotland                         | United Kingdom      | 162            | 7 – 540                         | -0.448 (0.654)  |
|                  | England, Wales, Northern Ireland |                     | 20,480         | 905 – 59,286                    | 0.342 (0.733)   |
|                  | n.a.                             | Republic of Ireland | 9,229          | 367 – 29,780                    | 0.181 (0.856)   |
|                  |                                  | Total               | 29,871         | 1,279 – 89,606                  |                 |
| Goat             | n.a.                             | United Kingdom      | 19             | 1 – 76                          | -1.927 (0.054)  |
|                  |                                  | Republic of Ireland | 2              | 0 – 7                           | -1.927 (0.054)  |
|                  |                                  | Total               | 21             | 1 - 83                          |                 |
| Sheep            | n.a.                             | United Kingdom      | 3              | 0 – 17                          | 1.159 (0.246)   |
|                  |                                  | Republic of Ireland | 1              | 0 – 3                           | 1.159 (0.246)   |
|                  |                                  | Total               | 4              | 0 – 20                          |                 |
| Pig              | n.a.                             | United Kingdom      | 5              | 0 – 25                          | -1.211 (0.226)  |
|                  |                                  | Republic of Ireland | 2              | 0 - 8                           | -1.211 (0.226)  |
|                  |                                  | Total               | 7              | 0 - 33                          |                 |
| Cervids (farmed) | n.a.                             | United Kingdom      | 42             | 2 - 222                         | -0.433 (0.665)  |
|                  |                                  | Republic of Ireland | 31             | 1 - 165                         | -0.433 (0.665)  |
|                  |                                  | Total               | 73             | 3 - 387                         |                 |
| Wild boar        | n.a.                             | United Kingdom      | 74             | 8 - 325                         | 1.825 (0.068)   |
| Red deer         | Scotland                         | United Kingdom      | 0              | n.a.                            |                 |
|                  | England, Wales, Northern Ireland |                     | 94             | 4 – 354                         | 0.869 (0.385)   |
|                  | n.a.                             | Republic of Ireland | 25             | 1 - 98                          | 0.556 (0.579)   |
|                  |                                  | Total               | 119            | 5 – 452                         |                 |
| Fallow deer      | Scotland                         | United Kingdom      | 0              | n.a.                            |                 |
|                  | England, Wales, Northern Ireland |                     | 10,283         | 541 – 23,354                    | -1.222 (0.222)  |
|                  | n.a.                             | Republic of Ireland | 338            | 18 - 905                        | -1.169 (0.243)  |
|                  |                                  | Total               | 10,621         | 559 – 24,259                    |                 |
| Badger           | Scotland                         | United Kingdom      | 0              | n.a.                            |                 |
|                  | Endemic regions                  |                     | 73,350         | 50,978 – 118,075                | -0.420 (0.675)  |
|                  | Non-endemic regions              |                     | 7,648          | 2,276 – 17,459                  | 0.303 (0.762)   |
|                  | n.a.                             | Republic of Ireland | 10,645         | 9,056 – 12,691                  | -1.206 (0.228)  |
|                  |                                  | Total               | 91,643         | 62,310 – 148,225                |                 |

n.a. – not applicable

**Table S4.** Summary of the posterior distributions of the number of infected animals by host species in Britain and Ireland.

| Host species     | Regionalization                                                               | Country           | Diagnostic test (proportional weight if combination of priors) | True prevalence  |                                 |                          |            |
|------------------|-------------------------------------------------------------------------------|-------------------|----------------------------------------------------------------|------------------|---------------------------------|--------------------------|------------|
|                  |                                                                               |                   |                                                                | Median           | Credible Interval <sup>95</sup> | Brooks-Gelman-Rubin test | References |
| Cattle           | <i>Départments</i> undergoing annual or biennial SITT <sup>(1)</sup>          | France            | SITT                                                           | 0.0004141504     | 1.670802e-5<br>0.001541546      | 1.0006                   | [99]       |
|                  | <i>Départments</i> undergoing annual or biennial SCITT <sup>(2)</sup>         |                   | SCITT                                                          | 0.0005631272     | 2.475756e-5<br>0.001695942      | 1.0001                   |            |
|                  | <i>Départments</i> not undergoing annual or biennial skin test <sup>(3)</sup> |                   | SCITT                                                          | 6.629754e-5      | 2.791990e-6<br>0.0002783877     | 1.0000                   | [100]      |
|                  | n.a.                                                                          | Germany           | SCITT                                                          |                  |                                 |                          |            |
| Goat             | n.a.                                                                          | France<br>Germany | Meat inspection –<br>Bacteriological culture<br>(in series)    | 6,79e-6          | 2.98e-7<br>2.65e-5              | 1.0000                   | [77,101]   |
| Sheep            | n.a.                                                                          | France<br>Germany | Meat inspection –<br>Bacteriological culture<br>(in series)    | 3.231076e-7      | 1.18e-8<br>1.89e-6              | 1.0001                   | [77]       |
| Pig              | n.a.                                                                          | France<br>Germany | Meat inspection -<br>Bacteriological culture<br>(in series)    | 8.232490e-8      | 2.959828e-9<br>5.577189e-7      | 1.0001                   | [77,102]   |
| Cervids (farmed) | n.a.                                                                          | France<br>Germany | Bacteriological culture                                        | 0.0006950049     | 3.124447e-5<br>0.002699539      | 1.0001                   | [103-105]  |
| Wild boar        | Endemic regions <sup>(4)</sup>                                                | France            | Bacteriological culture                                        | 0.02337694       | 0.002798085<br>0.03896244       | 1.0011                   | [106]      |
|                  | Non-endemic regions <sup>(5)</sup>                                            |                   | n.a.                                                           | 0 <sup>(6)</sup> | n.a.                            | n.a.                     |            |
|                  | n.a.                                                                          | Germany           | n.a.                                                           | 0 <sup>(6)</sup> | n.a.                            | n.a.                     |            |
| Red deer         | Endemic regions <sup>(4)</sup>                                                | France            | Bacteriological culture                                        | 0.004955674      | 0.0002343514<br>0.01655158      | 1.0000                   | [106]      |
|                  | Non-endemic regions <sup>(5)</sup>                                            |                   | n.a.                                                           | 0 <sup>(6)</sup> | n.a.                            | n.a.                     |            |
|                  | n.a.                                                                          | Germany           | Bacteriological culture (0.50)                                 | 0.009977578      | 0.0004703266<br>0.03483379      | 1.0000                   | [107]      |
|                  |                                                                               |                   | Bacteriological culture (0.50)                                 | 0.004734339      | 1.952244e-7<br>0.02077311       | 1.0001                   | [108]      |
|                  |                                                                               |                   | Combined                                                       | 0.00696          | 0.000241<br>0.0316              |                          |            |
| Fallow deer      | n.a.                                                                          | France<br>Germany | n.a.                                                           | 0 <sup>(6)</sup> | n.a.                            | n.a.                     |            |
| Badger           | Endemic regions <sup>(4)</sup>                                                | France            | Bacteriological culture <i>post-mortem</i> standard protocol   | 0.07561729       | 0.05360701<br>0.1107847         | 1.0000                   | [106]      |
|                  | Non-endemic regions <sup>(5)</sup>                                            |                   | n.a.                                                           | 0 <sup>(6)</sup> | n.a.                            | n.a.                     |            |
|                  | n.a.                                                                          | Germany           | n.a.                                                           | 0 <sup>(6)</sup> | n.a.                            | n.a.                     |            |

(1) *Départments* undergoing annual or biennial testing by SITT in cattle: Alpes-Maritimes, Bouches-du-Rhône, Landes, Lot-et-Garonne, Savoie, Var

(2) *Départments* undergoing annual or biennial testing by SCITT in cattle: Cote d'Or

(3) *Départments* not undergoing annual or biennial testing by skin test in cattle: all others in France

(4) *Départments* containing at-risk areas [107]: Ardennes, Ariège, Charente, Charente-Maritime, Corrèze, Côte-d'Or, Dordogne, Haute-Garonne, Gironde, Loir-et-Cher, Lot, Lot-et-Garonne, Marne, Pyrénées-Atlantiques, Seine-Maritime, Haute-Vienne

(5) *Départments* without at-risk areas [107]: all others in France

(6) Not detected – Null prevalence assumed

n.a. – not applicable



**Table S5.** Summary of the posterior distributions of the true prevalence by host species in Central-Western Europe and supporting references. TB prevalence in goats and pigs estimated from abattoir surveillance data [102,103]. TB prevalence in sheep estimated assuming no detections from slaughterhouse surveillance [102,103]. Estimates of TB prevalence in wild boar, red deer and badgers in endemic regions based on targeted surveillance in level 3 *départments* from 2011-2014 [107].

| Host species     | Regionalization                                            | Country | Host population |           |                                 | References                                                                         |
|------------------|------------------------------------------------------------|---------|-----------------|-----------|---------------------------------|------------------------------------------------------------------------------------|
|                  |                                                            |         | Exact           | Median    | Credible Interval <sup>95</sup> |                                                                                    |
| Cattle           | Départments undergoing annual or biennial SITT testing     | France  | 218,800         |           |                                 | [77,109]                                                                           |
|                  | Départments undergoing annual or biennial SCITT testing    |         | 234,900         |           |                                 |                                                                                    |
|                  | Départments not undergoing annual or biennial skin testing |         | 18,979,020      |           |                                 |                                                                                    |
|                  | n.a.                                                       | Germany | 12,365,500      |           |                                 |                                                                                    |
| Goat             | n.a.                                                       | France  | 1,213,000       |           |                                 | [77]                                                                               |
|                  |                                                            | Germany | 140,000         |           |                                 |                                                                                    |
| Sheep            | n.a.                                                       | France  | 6,877,000       |           |                                 |                                                                                    |
|                  |                                                            | Germany | 1,579,790       |           |                                 |                                                                                    |
| Pig              | n.a.                                                       | France  | 13,353,000      |           |                                 |                                                                                    |
|                  |                                                            | Germany | 27,577,570      |           |                                 |                                                                                    |
| Cervids (farmed) | n.a.                                                       | France  | 30,000          |           |                                 | [110]                                                                              |
|                  |                                                            | Germany | 7,500           |           |                                 | [66]                                                                               |
| Wild boar        | Endemic regions                                            | France  |                 | 294,632   | 212,739 – 851,727               | Hunting bag: [111,112]                                                             |
|                  | Non-endemic regions                                        | France  |                 | 1,231,896 | 889,492 – 3,561,190             | Proportion hunted: [43-46]                                                         |
|                  | n.a.                                                       | Germany |                 | 1,269,034 | 916,308 – 3,668,550             |                                                                                    |
| Red deer         | Endemic regions                                            | France  |                 | 44,952    | 30,546 – 68,456                 | Hunting bag: [111,1123]<br>Proportion hunted: [47-49]<br>Expert opinion: [113-114] |
|                  | Non-endemic regions                                        | France  |                 | 141,163   | 95,751 – 214,245                |                                                                                    |
|                  | n.a.                                                       | Germany |                 | 244,375   | 167,762 – 368,331               |                                                                                    |
| Fallow deer      | n.a.                                                       | France  |                 | 3,966     | 2,409 – 6,493                   | Expert opinion: [113-114]                                                          |
|                  |                                                            | Germany |                 | 233,925   | 142,092 – 382,974               |                                                                                    |
| Badger           | Endemic regions                                            | France  |                 | 43,058    | 3,818 – 78,827                  | [115,116]                                                                          |
|                  | Non-endemic regions                                        |         |                 | 200,866   | 16,069 – 482,078                |                                                                                    |
|                  | n.a.                                                       | Germany |                 | 225,468   | 84,407 – 546,131                | [117]                                                                              |

n.a. – not applicable

**Table S6.** Summary of the posterior distributions of the abundance by host species in Central-Western Europe and supporting references. Red deer and fallow deer populations estimated by combination of expert opinion (0.30 weight) [114,115]; and number of animals hunted (average 2015-2016 hunting seasons) [112,113], multiplied by the proportion of the population hunted annually (0.70 weight) [34-36]. Badger population in France estimated based on reported range of densities [116,117], multiplied by the proportion of French territory in endemic/non-endemic *départments* [107].

| Host species     | Regionalization                                                   | Country | Infected hosts |                                 |                 |
|------------------|-------------------------------------------------------------------|---------|----------------|---------------------------------|-----------------|
|                  |                                                                   |         | Median         | Credible Interval <sup>95</sup> | Geweke test (p) |
| Cattle           | <i>Départments</i> undergoing annual or biennial SITT testing     | France  | 92             | 4 - 340                         | -0.200 (0.842)  |
|                  | <i>Départments</i> undergoing annual or biennial SCITT testing    |         | 133            | 6 - 398                         | -0.794 (0.427)  |
|                  | <i>Départments</i> not undergoing annual or biennial skin testing |         | 1,258          | 53 – 5,281                      | -0.064 (0.949)  |
|                  | n.a.                                                              | Germany | 820            | 35 – 3,441                      | -0.064 (0.949)  |
|                  |                                                                   | Total   | 2,303          | 98 – 9,460                      |                 |
| Goat             | n.a.                                                              | France  | 8              | 0 - 32                          | 1.215 (0.224)   |
|                  |                                                                   | Germany | 1              | 0 - 4                           | 1.215 (0.224)   |
|                  |                                                                   | Total   | 9              | 0 - 36                          |                 |
| Sheep            | n.a.                                                              | France  | 2              | 0 - 13                          | 0.825 (0.410)   |
|                  |                                                                   | Germany | 1              | 0 - 3                           | 0.825 (0.410)   |
|                  |                                                                   | Total   | 3              | 0 - 16                          |                 |
| Pig              | n.a.                                                              | France  | 1              | 0 - 7                           | -0.468 (0.640)  |
|                  |                                                                   | Germany | 2              | 0 - 15                          | -0.468 (0.640)  |
|                  |                                                                   | Total   | 3              | 0 - 22                          |                 |
| Cervids (farmed) | n.a.                                                              | France  | 21             | 1 - 82                          | -1.635 (0.102)  |
|                  |                                                                   | Germany | 5              | 0 - 20                          | -1.635 (0.102)  |
|                  |                                                                   | Total   | 26             | 1 - 102                         |                 |
| Wild boar        | Endemic regions                                                   | France  | 7,118          | 846 – 22,716                    | -0.791 (0.429)  |
|                  | Non-endemic regions                                               |         | 0              | n.a.                            |                 |
|                  | n.a.                                                              | Germany | 0              | n.a.                            |                 |
|                  |                                                                   | Total   | 7,118          | 846 – 22,716                    |                 |
| Red deer         | Endemic regions                                                   | France  | 220            | 10 – 809                        | 0.130 (0.897)   |
|                  | Non-endemic regions                                               |         | 0              | n.a.                            |                 |
|                  | n.a.                                                              | Germany | 1,692          | 58 – 8,224                      | 1.071 (0.284)   |
|                  |                                                                   | Total   | 1,912          | 68 – 9,033                      |                 |
| Fallow deer      | n.a.                                                              | France  | 0              | n.a.                            |                 |
|                  |                                                                   | Germany | 0              | n.a.                            |                 |
|                  |                                                                   | Total   | 0              | n.a.                            |                 |
| Badger           | Endemic regions                                                   | France  | 3,231          | 940 – 6,756                     | -0.408 (0.627)  |
|                  | Non-endemic regions                                               |         | 0              | n.a.                            |                 |
|                  | n.a.                                                              | Germany | 0              | n.a.                            |                 |
|                  |                                                                   | Total   | 3,231          | 940 – 6,756                     |                 |

n.a. – not applicable

**Table S7.** Summary of the posterior distributions of the number of infected animals by host species in Central-Western Europe.

| Host species            | Regionalization                                                  | Country           | Diagnostic test<br>(proportional weight if<br>combination of priors) | True prevalence  |                                    |                                  |                  |
|-------------------------|------------------------------------------------------------------|-------------------|----------------------------------------------------------------------|------------------|------------------------------------|----------------------------------|------------------|
|                         |                                                                  |                   |                                                                      | Median           | Credible<br>Interval <sup>95</sup> | Brooks-<br>Gelman-<br>Rubin test | References       |
| Cattle                  | n.a.                                                             | Spain             | SITT                                                                 | 0.000861650      | 3.470549e-5<br>0.003217358         | 1.0060<br>( <sup>1</sup> )       | [75]             |
|                         |                                                                  | Portugal          | SCITT                                                                | 0.000286265      | 1.236615e-5<br>0.0008420191        | 1.0004                           |                  |
| Goat                    | No long-term eradication<br>program in caprines ( <sup>2</sup> ) | Spain<br>Portugal | SCITT                                                                | 0.05136874       | 0.03789387<br>0.08299825           | 1.0006<br>( <sup>1</sup> )       | [118]            |
|                         | Long term eradication<br>program in caprine ( <sup>3</sup> )     | Spain             | SITT                                                                 | 0.000443180      | 1.697337e-<br>50.001985997         | 1.0001                           | [119]            |
| Sheep                   | n.a.                                                             | Spain<br>Portugal | ELISA-Interferon $\gamma$ assay (in<br>series)                       | 0.00179478       | 0.0000735947<br>0.008128424        | 1.0000                           | IREC<br>(unpub.) |
| Pig<br>(free-<br>range) | n.a.                                                             | Spain<br>Portugal | ELISA                                                                | 0.008186200      | 0.0005520730<br>0.02203972         | 1.0001                           | [48]             |
| Cervids<br>(farmed)     | n.a.                                                             | Spain             | SITT                                                                 | 0.00239126       | 9.142929e-5<br>0.0122240           | 1.0003                           | [120]            |
| Wild boar               | Endemic regions ( <sup>4</sup> )                                 | Spain             | Gross pathology<br>(0.25)                                            | 0.7609085        | 0.6300402<br>0.9670142             | 1.0007                           | [121]            |
|                         |                                                                  |                   | Gross pathology<br>(0.25)                                            | 0.5465099        | 0.4205817<br>0.8054564             | 1.0002                           | [122]            |
|                         |                                                                  |                   | ELISA<br>(0.25)                                                      | 0.7031711        | 0.5404390<br>0.9510652             | 1.0004                           | [123]            |
|                         |                                                                  |                   | ELISA<br>(0.25)                                                      | 0.4348425        | 0.3147407<br>0.6702440             | 1.0001                           | [124]            |
|                         |                                                                  |                   | Combined                                                             | 0.630            | 0.351<br>0.939                     |                                  |                  |
|                         |                                                                  | Portugal          | ELISA<br>(0.33)                                                      | 0.2212445        | 0.1271466<br>0.3382338             | 1.0000                           | [125]            |
|                         |                                                                  |                   | Bacteriological culture<br>(0.33)                                    | 0.2619104        | 0.1935771<br>0.3683385             | 1.0000                           |                  |
|                         |                                                                  |                   | Meat inspection<br>(0.33)                                            | 0.1803245        | 0.1333477<br>0.2699077             | 1.0002                           |                  |
|                         | Combined                                                         |                   | 0.222                                                                | 0.137<br>0.345   |                                    |                                  |                  |
|                         | Non-endemic regions ( <sup>5</sup> )                             | Portugal          | ELISA                                                                | 0.001490437      | 5.44e-5<br>0.00785                 | 1.0000                           | [125]            |
|                         |                                                                  | Spain             | Bacteriological culture<br>(0.50)                                    | 0.04488553       | 0.01107392<br>0.06554483           | 1.0006                           | [119]            |
|                         |                                                                  |                   | Bacteriological culture<br>(0.50)                                    | 0.02458174       | 0.003057920<br>0.04386654          | 1.0000                           | [127]            |
| Combined                |                                                                  |                   | 0.0333                                                               | 0.0048<br>0.0612 |                                    |                                  |                  |
| Red deer                | Endemic regions ( <sup>4</sup> )                                 | Spain             | Bacteriological culture<br>(0.50)                                    | 0.04295531       | 0.002312960<br>0.1101596           | 1.0012                           | [121]            |
|                         |                                                                  |                   | ELISA<br>(0.50)                                                      | 0.03272815       | 0.001638379<br>0.09346738          | 1.0000                           | [122]            |
|                         |                                                                  |                   | Combined                                                             | 0.0383           | 0.00188<br>0.106                   |                                  |                  |
|                         | Non-endemic regions ( <sup>5</sup> )                             |                   | Bacteriological culture                                              | 0.01544085       | 0.0007688408<br>0.03533709         | 1.0004                           | [119]            |

|             |                                    |                   |                                                              |                  |                          |        |       |
|-------------|------------------------------------|-------------------|--------------------------------------------------------------|------------------|--------------------------|--------|-------|
|             | n.a.                               | Portugal          | Bacteriological culture (0.50)                               | 0.1315712        | 0.007944894<br>0.2575010 | 1.0000 | [125] |
|             |                                    |                   | Meat inspection (0.50)                                       | 0.05226237       | 0.002557873<br>0.1347850 | 1.0006 | [126] |
|             |                                    |                   | Combined                                                     | 0.0773           | 0.00359<br>0.241         |        |       |
| Fallow deer | Endemic regions <sup>(4)</sup>     | Spain             | Gross pathology - Bacteriological culture (in series) (0.33) | 0.2369761        | 0.03059517<br>0.4489423  | 1.0002 | [128] |
|             |                                    |                   | Gross pathology (0.33)                                       | 0.1329399        | 0.009332847<br>0.3075522 | 1.0002 | [122] |
|             |                                    |                   | ELISA (0.33)                                                 | 0.07530128       | 0.004632357<br>0.2074204 | 1.0001 | [123] |
|             |                                    |                   | Combined                                                     | 0.134            | 0.00866<br>0.386         |        |       |
|             | Non-endemic regions <sup>(5)</sup> |                   | Bacteriological culture                                      | 0.06292065       | 0.003367532<br>0.1592813 | 1.0001 | [119] |
|             | n.a.                               | Portugal          | n.a.                                                         | 0 <sup>(6)</sup> | n.a.                     | n.a.   | n.a.  |
| Badger      | Euro-Siberian bioregion            | Spain<br>Portugal | Bacteriological culture<br><i>post-mortem</i> detailed       | 0.1608726        | 0.09463825<br>0.2488233  | 1.0000 | [129] |
|             | Mediterranean bioregion            |                   | n.a.                                                         | 0 <sup>(6)</sup> | n.a.                     | n.a.   |       |

<sup>(1)</sup> 1,000,000 iterations with 1,000,000 as burnin

<sup>(2)</sup> Spain: Castilla y León, Murcia

<sup>(3)</sup> The rest of the Iberian Peninsula

<sup>(4)</sup> Portugal: As defined in “*Edital nº 1 – Tuberculose em Caça Maior*”; Spain: Andalucía, Castilla la Mancha, Extremadura, Madrid

<sup>(5)</sup> The remainder of the Iberian Peninsula

<sup>(6)</sup> Not detected – Null prevalence assumed

n.a. – not applicable

**Table S8.** Summary of the posterior distributions of the true prevalence by host species in the Iberian Peninsula and supporting references.

| Host species     | Regionalization                              | Country  | Host population |         |                                         | References                                                                        |
|------------------|----------------------------------------------|----------|-----------------|---------|-----------------------------------------|-----------------------------------------------------------------------------------|
|                  |                                              |          | Exact           | Median  | Credible Interval <sup>95</sup>         |                                                                                   |
| Cattle           | n.a.                                         | Spain    | 6,588,110       |         |                                         | [77]                                                                              |
|                  |                                              | Portugal | 1,722,160       |         |                                         |                                                                                   |
| Goat             | Long term eradication program in caprines    | Spain    | 581,672         |         |                                         | [77,130]                                                                          |
|                  | No long-term eradication program in caprines | Portugal | 2,479,758       |         |                                         |                                                                                   |
| Sheep            | n.a.                                         | Spain    | 15,963,110      |         |                                         | [77]                                                                              |
|                  |                                              | Portugal | 2,224,690       |         |                                         |                                                                                   |
| Pig (free-range) | n.a.                                         | Spain    | 2,175,022       |         |                                         | [41]                                                                              |
|                  |                                              | Portugal | 577,825         |         |                                         | [42]                                                                              |
| Cervids (farmed) | n.a.                                         | Spain    |                 | 8,873   | 5,108 – 11,181                          | [132]; expert opinion [CG, NS]                                                    |
| Wild boar        | Endemic regions                              | Spain    |                 | 318,822 | 230,206 – 921,656                       | Hunting bag: [132,133]<br>Proportion hunted: [43-46]                              |
|                  | Non-endemic regions                          |          | Portugal        | 18,484  | 13,346 – 53,433                         |                                                                                   |
|                  |                                              |          | 437,495         | 63,244  | 315,894 – 1,264,720<br>45,666 – 182,828 |                                                                                   |
| Red deer         | Endemic regions                              | Spain    |                 | 490,663 | 327,189 – 755,986                       | Hunting bag: [132,133]<br>Proportion hunted: [47-49]<br>Expert opinion: [134-135] |
|                  | Non-endemic regions                          |          |                 | 55,739  | 37,096 – 85,998                         |                                                                                   |
|                  | n.a.                                         | Portugal |                 | 13,399  | 8,558 – 18,567                          |                                                                                   |
| Fallow deer      | Endemic regions                              | Spain    |                 | 77,738  | 47,220 – 127,270                        | Expert opinion: [134-135]                                                         |
|                  | Non-endemic regions                          |          |                 | 7,012   | 2,919 – 11,479                          |                                                                                   |
|                  | n.a.                                         | Portugal |                 | 2,718   | 2,004 – 3,876                           |                                                                                   |
| Badger           | Euro-Siberian bioregion                      | Spain    |                 | 130,241 | 62,020 – 203,138                        | [136-139]                                                                         |
|                  | Mediterranean bioregion                      | Portugal |                 | 251,719 | 194,468 – 308,453                       | [136,137,139]                                                                     |

n.a. – not applicable

**Table S9.** Summary of the posterior distributions of the abundance by host species in the Iberian Peninsula and supporting references. Red and fallow deer population estimated by combination of expert opinion (0.30 weight) [135,136] and hunting bag [133,134] multiplied for the proportion of the population hunted [34-36] (0.70 weight). Badger population estimated separately for the Euro-Siberian and Mediterranean bioregions of the Iberian Peninsula [140], as very different densities have been reported for each [137-139].

| Host species     | Regionalization                              | Country  | Infected hosts    |                                 |                 |
|------------------|----------------------------------------------|----------|-------------------|---------------------------------|-----------------|
|                  |                                              |          | Median            | Credible Interval <sup>95</sup> | Geweke test (p) |
| Cattle           | n.a.                                         | Spain    | 5,685             | 232 – 20,923                    | -0.301 (0.763)  |
|                  |                                              | Portugal | 490               | 21 – 1,433                      | 1.360 (0.174)   |
|                  |                                              | Total    | 6,1775            | 253 – 22,356                    |                 |
| Goat             | Long term eradication program in caprines    | Spain    | 258               | 10 – 1,170                      | -0.884 (0.377)  |
|                  | No long-term eradication program in caprines | Portugal | 128,102           | 93,990 – 203,233                | -0.002 (0.998)  |
|                  |                                              | Total    | 17,546            | 12,874 – 27,837                 | -0.002 (0.998)  |
|                  | n.a.                                         | Total    | 145,906           | 106,874 – 232,240               |                 |
| Sheep            | n.a.                                         | Spain    | 28,463            | 1,179 – 128,818                 | 0.230 (0.818)   |
|                  |                                              | Portugal | 3,967             | 164 – 17,953                    | 0.230 (0.818)   |
|                  |                                              | Total    | 32,430            | 1,343 – 146,771                 |                 |
| Pig (free-range) | n.a.                                         | Spain    | 20,062            | 1,207 – 47,972                  | 0.8645 (0.387)  |
|                  |                                              | Portugal | 5,330             | 321 – 12,744                    | 0.8645 (0.387)  |
|                  |                                              | Total    | 25,392            | 1,528 – 60,716                  |                 |
| Cervids (farmed) | n.a.                                         | Spain    | 21                | 1 - 115                         | -1.556 (0.120)  |
|                  |                                              | Total    | 21                | 1 - 115                         |                 |
| Wild boar        | Endemic regions                              | Spain    | 209,445           | 99,438 – 628,371                | -0.837 (0.403)  |
|                  | Non-endemic regions                          |          | Portugal          | 4,284                           | 2,057 – 12,960  |
|                  | n.a.                                         | Portugal | 15,796            | 2,288 – 51,443                  | 0.669 (0.503)   |
|                  |                                              | Total    | 104               | 4 - 712                         | 0.790 (0.429)   |
| Total            |                                              | 229,629  | 103,787 – 693,486 |                                 |                 |
| Red deer         | Endemic regions                              | Spain    | 18,259            | 866 – 57,047                    | -1.460 (0.144)  |
|                  | Non-endemic regions                          |          |                   | 840                             | 40 – 2,246      |
|                  | n.a.                                         | Portugal | 1,035             | 47 – 3,471                      | 0.448 (0.654)   |
|                  |                                              | Total    | 20,134            | 953 – 62,764                    |                 |
| Fallow deer      | Endemic regions                              | Spain    | 10,265            | 636 – 34,392                    | -0.522 (0.602)  |
|                  | Non-endemic regions                          |          |                   | 428                             | 23 – 1,286      |
|                  | n.a.                                         | Portugal | 0                 | n.a.                            |                 |
|                  |                                              | Total    | 10,693            | 659 – 35,678                    |                 |
| Badger           | Euro-Siberian bioregion                      | Spain    | 20,403            | 8,543 – 39,957                  | -0.976 (0.329)  |
|                  | Mediterranean bioregion                      | Portugal | 0                 | n.a.                            |                 |
|                  | n.a.                                         | Total    | 20,403            | 8,543 – 39,957                  |                 |

n.a. – not applicable

**Table S10.** Summary of the posterior distributions of the number of infected animals by host species in the Iberian Peninsula.

## References

54. Álvarez, J.; Pérez, A.; Bezos, J.; Marqués, S.; Grau, A.; Sáez, J.L.; Mínguez, O.; de Juan, L.; Domínguez, L. Evaluation of the sensitivity and specificity of bovine tuberculosis diagnostic tests in naturally infected cattle herds using a Bayesian approach. *Vet. Microbiol.* 2012, 155, 38–43.
55. Casal, C.; Infantes, J.A.; Rivalde, M.A.; Díez-Guerrier, A.; Domínguez, M.; Moreno, I.; de Juana, L.; Sáez, J.L.; Juste, R.; Gortázar, C.; et al. Antibody detection tests improve the sensitivity of tuberculosis diagnosis in cattle. *Res. Vet. Sci.* 2017, 112, 214–221.
56. Pucken, V.B.; Knubben-Schweizer, G.; Döpfer, D.; Groll, A.; Hafner-Marx, A.; Hörmansdorfer, S.; Sauter-Louis, C.; Straubinger, R.K.; Zimmermann, P.; Hartnack, S. Evaluating diagnostic tests for bovine tuberculosis in the southern part of Germany: A latent class analysis. *PLoS One* 2017, 12, e0179847.
57. Lahuerta-Marin, A.; Milne, M.G.; McNair, J.; Skuce, R.A.; McBride, S.H.; Menzies, F.D.; McDowell, S.J.W.; Byrne, A.W.; Handel, I.G.; Bronsvort, B.D.C. Bayesian latent class estimation of sensitivity and specificity parameters of diagnostic tests for bovine tuberculosis in chronically infected herds in Northern Ireland. *Vet. J.* 2018, 238, 15–21.
58. Álvarez, J.; de Juan, L.; Bezos, J.; Romero, B.; Sáez, J.L.; Gordejo, F.R.; Briones, V.; Moreno, M.A.; Mateos, A.; Domínguez, L.; et al. Interference of paratuberculosis with the diagnosis of tuberculosis in a goat flock with a natural mixed infection. *Vet. Microbiol.* 2008, 128, 72–80.
59. Bezos, J.; Álvarez, J.; Mínguez, O.; Marqués, S.; Martín, O.; Vigo, V.; Pieltain, C.; Romero, B.; Rodríguez, S.; Casal, C.; et al. Evaluation of specificity of tuberculosis diagnostic assays in caprine flocks under different epidemiological situations. *Res. Vet. Sci.* 2012, 93, 636–640.
60. Gutiérrez, M.; Tellechea, J.; Marín, J.F.G. Evaluation of cellular and serological diagnostic tests for the detection of *Mycobacterium bovis*-infected goats. *Vet. Microbiol.* 1998, 62, 281–290.
61. Hardstaff, J.; Nigsch, A.; Dadios, N.; Stärk, K.; Alonso, S.; Lindberg, A. Contribution of meat inspection to animal health surveillance in sheep and goats. *EFSA Sup. Pub.* 2012, 9, 320E.
62. Bermingham, M.L.; Handel, I.G.; Glass, E.J.; Woolliams, J.A.; Bronsvort, B.M.C.; McBride, S.H.; Skuce, R.A.; Allen, A.R.; McDowell, S.W.J.; Bishop, S.C. Hui and Walter's latent-class model extended to estimate diagnostic test properties from surveillance data: A latent model for latent data. *Sci. Rep.* 2015, 5, 11861.
63. Thomas, J.; Infantes-Lorenzo, J.A.; Moreno, I.; Cano-Terriza, D.; de Juan, L.; García-Bocanegra, I.; Domínguez, L.; Domínguez, M.; Gortázar, C.; Rivalde, M.A. Validation of a new serological assay for the identification of *Mycobacterium tuberculosis* complex-specific antibodies in pigs and wild boar. *Prev. Vet. Med.* 2018, 162, 11–17.
64. Santos, N.; Geraldés, M.; Afonso, A.; Almeida, V.; Correia-Neves, M. Diagnosis of tuberculosis in the wild boar (*Sus scrofa*): A comparison of methods applicable to hunter-harvested animals. *PLoS One* 2010, 5, e12663.
65. Boadella, M.; Lyashchenko, K.; Greenwald, R.; Esfandiari, J.; Jaroso, R.; Carta, T.; Garrido, J.M.; Vicente, J.; de la Fuente, J.; Gortázar, C. Serologic tests for detecting antibodies against *Mycobacterium bovis* and *Mycobacterium avium* subspecies paratuberculosis in Eurasian wild boar (*Sus scrofa scrofa*). *J. Vet. Diag. Invest.* 2011, 23, 77–83.
66. Martín-Hernando, M.P.; Höfle, U.; Vicente, J.; Ruiz-Fons, F.; Vidal, D.; Barral, M.; Garrido, J.M.; de la Fuente, J.; Gortázar, C. Lesions associated with *Mycobacterium tuberculosis* complex infection in the European wild boar. *Tuberculosis* 2007, 87, 360–367.
67. European Food Safety Authority. Scientific opinion of the panel on animal health and animal welfare on a request from the European Commission on tuberculosis testing in deer. *EFSA J.* 2008, 645, 1–34.
68. Martín-Hernando, M.P.; Torres, M.J.; Aznar, J.; Negro, J.J.; Gandía, A.; Gortázar, C. Distribution of lesions in red and fallow deer naturally infected with *Mycobacterium bovis*. *J. Comp. Pathol.* 2010, 142, 43–50.
69. Boadella, M.; Barasona, J.A.; Díaz-Sánchez, S.; Lyashchenko, K.P.; Greenwald, R.; Esfandiari, J.; Gortázar, C. Performance of immunochromatographic and ELISA tests for detecting fallow deer infected with *Mycobacterium bovis*. *Prev. Vet. Med.* 2012, 104, 160–164.
70. Crawshaw, T.R.; Griffiths, I.B.; Clifton-Hadley, R.S. Comparison of a standard and a detailed postmortem protocol for detecting *Mycobacterium bovis* in badgers. *Vet. Rec.* 2008, 163, 473–477.
71. Drewe, J.A.; Tomlinson, A.J.; Walker, N.J.; Delahay, R.J. Diagnostic accuracy and optimal use of three tests for tuberculosis in live badgers. *PLoS One* 2010, 5, e11196.



72. Buzdugan, S.N.; Chambers, M.A.; Delahay, R.J.; Drewe, J.A. Diagnosis of tuberculosis in groups of badgers: An exploration of the impact of trapping efficiency, infection prevalence and the use of multiple tests. *Epidemiol. Infect.* 2016, *144*, 1717–1727.
73. Corner, L.A.; O'Meara, D.; Costello, E.; Lesellier, S.; Gormley, E. The distribution of *Mycobacterium bovis* infection in naturally infected badgers. *Vet. J.* 2012, *194*, 166–172.
74. American Pharmacists Association. Bovine tuberculosis: Infection status in cattle in GB, annual surveillance report for the period January to December 2017. In Animal and Plant Health Agency, Report Project SB4500; 2018. Available online: <https://assets.publishing.service.gov.uk> (accessed on 12 December 2018).
75. DG Sanco. Approved Veterinary Programmes, 2017 Data. Available online: [https://ec.europa.eu/food/funding/animal-health/national-veterinary-programmes\\_en](https://ec.europa.eu/food/funding/animal-health/national-veterinary-programmes_en) (accessed on 18 May 2020).
76. DEFRA. Statistics on Bovine TB in Non-Bovine Species, 2012–2016 Data. Available online: [www.gov.uk/government/statistical-data-sets/other-tb-statistics](http://www.gov.uk/government/statistical-data-sets/other-tb-statistics) (accessed on 15 December 2017).
77. Eurostat. Livestock and Meat Production Database, 2017 Data. Available online: <http://ec.europa.eu/eurostat/web/agriculture/data/database> (accessed on 18 May 2020).
78. Barlow, A. Living with feral wild boar in the Forest of Dean—Disease risks and contingency plan. APHA Wildlife & Pig Species Expert Groups, APHA Starcross Veterinary Investigation Centre. In Workshop 'Living with Feral Wild Boar; Forestry Commission: 2017. Available online: <http://adlib.everysite.co.uk/resources/000/250/259/feralwildboar.pdf> (accessed on 12 December 2018).
79. Williamson, S.; Smith, R.; Barlow, A. Surveillance for non-statutory pathogens in culled wild boar in the forest of Dean. In BPEX Project RDOR1035; AHVLA Pig and Wildlife Expert Groups: 2014. Available online: <http://apha.defra.gov.uk/documents/surveillance/diseases/wild-boar-surveillance-1516.pdf> (accessed on 12 December 2018).
80. Delahay, R.J.; Smith, G.C.; Barlow, A.M.; Walker, N.; Harris, A.; Clifton-Hadley, R.S.; Cheeseman, C.L. Bovine tuberculosis infection in wild mammals in the South-West region of England: A survey of prevalence and a semi-quantitative assessment of the relative risks to cattle. *Vet. J.* 2007, *173*, 287–301.
81. Patterson, A. Report of the 2006–2007 South-west England and Cotswolds survey of tuberculosis in deer. In Tuberculosis Programme; Defra: 2008. Available online: <http://defra.gov.uk/animalh/tb> (accessed on 15 December 2017).
82. Goodchild, A.V.; Watkins, G.H.; Sayers, A.R.; Jones, J.R.; Clifton-Hadley, R.S. Geographical association between the genotype of bovine tuberculosis in found dead badgers and in cattle herds. *Vet. Rec.* 2012, *170*, 259.
83. Courcier, E.A.; Menzies, F.D.; Strain, S.A.; Skuce, R.A.; Robinson, P.A.; Patterson, I.A.; McBride, K.R.; McCormick, C.M.; Walton, E.; McDowell, S.W.J.; et al. Monitoring *Mycobacterium bovis* in Eurasian badgers (*Meles meles*) killed by vehicles in Northern Ireland between 1998 and 2011. *Vet. Rec.* 2017, *182*, 259.
84. Barron, E.S.; Swift, B.; Chantrey, J.; Christley, R.; Gardner, R.; Jewell, C.; McGrath, I.; Mitchell, A.; O'Cathail, C.; Prosser, A.; et al. A study of tuberculosis in road traffic-killed badgers on the edge of the British bovine TB epidemic area. *Sci. Rep.* 2018, *8*, 17206.
85. Byrne, A.W.; Kenny, K.; Fogarty, U.; O'Keeffe, J.J.; More, S.J.; McGrath, G.; Teeling, M.; Martin, S.W.; Dohoo, I.R. Spatial and temporal analyses of metrics of tuberculosis infection in badgers (*Meles meles*) from the Republic of Ireland: Trends in apparent prevalence. *Prev. Vet. Med.* 2015, *122*, 345–354.
86. Scottish Government (2020) Scottish Agricultural Survey: December 2017. Available online: <https://www.gov.scot/publications/results-2017-december-agricultural-survey/> (accessed on 18 May 2020).
87. Quigley, F.C.; Costello, E.; Flynn, O.; Gogarty, A.; McGuirk, J.; Murphy, A.; Egan, J. Isolation of mycobacteria from lymph node lesions in deer. *Vet. Rec.* 1997, *141*, 516.
88. Partridge, T.; Toolan, D.; Egan, J.; More, S. Control of *Mycobacterium bovis* infection in two sika deer herds in Ireland. *Irish Vet. J.* 2008, *61*, 27.
89. Croft, S.; Chauvenet, A.L.; Smith, G.C. A systematic approach to estimate the distribution and total abundance of British mammals. *PLoS One* 2017, *12*, e0176339.
90. Mathews, F.; Kubasiewicz, L.M.; Gurnell, J.; Harrower, C.A.; McDonald, R.A.; Shore, R.F. A Review of the Population and Conservation Status of British Mammals: Technical Summary; Natural England: Peterborough, UK, 2018.

91. Battersby, J.; Tracking Mammals Partnership. UK mammals: Species status and population trends. In First Report by the Tracking Mammals Partnership, JNCC/Tracking Mammals Partnership, Peterborough: 2005. Available online: [http://archive.jncc.gov.uk/pdf/pub05\\_ukmammals\\_speciesstatusText\\_final.pdf](http://archive.jncc.gov.uk/pdf/pub05_ukmammals_speciesstatusText_final.pdf) (accessed on 12 December 2018).
92. Putman, R.J. Ungulates and their management in Great Britain and Ireland. In European Ungulates and Their Management in the 21st Century; Apollonio, M., Andersen, R., Putman, R., Eds.; Cambridge University Press: Cambridge, UK, 2010.
93. Ward, A.; Graham, C.; Etherington, T.R.; Delahay, R.J. Estimating the risk of cattle exposure to tuberculosis posed by wild deer relative to badgers in England and Wales. *J. Wildl. Dis.* 2009, 45, 1104–1120.
94. Reid, N.; Etherington, T.R.; Wilson, G.J.; Montgomery, W.I.; McDonald, R.A. Monitoring and population estimation of the European badger *Meles meles* in Northern Ireland. *Wildl. Biol.* 2012, 18, 46–57.
95. Wilson, G.; Harris, S.; McLaren, G. Changes in the British badger population, 1988 to 1997. People's Trust for Endangered Species: London, UK, 1997.
96. Rainey, E.; Butler, A.; Bierman, S.; Roberts, A.M.I. Scottish Badger Distribution Survey 2006–2009. In Estimating the Distribution and Density of Badger Main Setts in Scotland, Report by Scottish Badgers and Biomathematics and Statistics Scotland: 2009. Available online: [https://www.scottishbadgers.org.uk/userfiles/file/Main\\_folder1/C204587-Scottish-Badger-Distribution-Survey-06-09-Results-16-November-2009.pdf](https://www.scottishbadgers.org.uk/userfiles/file/Main_folder1/C204587-Scottish-Badger-Distribution-Survey-06-09-Results-16-November-2009.pdf) (accessed on 12 December 2018).
97. Kruuk, H.H.; Parish, T. Changes in the size of groups and ranges of the European badger (*Meles meles* L.) in an area in Scotland. *J. Anim. Ecol.* 1987, 56, 351–364.
98. Sleeman, D.P.; Davenport, J.; More, S.J.; Clegg, T.A.; Collins, J.D.; Martin, S.W.; Williams, D.H.; Griffin, J.M.; O'Boyle, I. How many Eurasian badgers *Meles meles* L. are there in the Republic of Ireland? *Eur. J. Wildl. Res.* 2009, 55, 333–344.
99. Cavalerie, L.; Courcou, A.; Boschioli, M.L.; Réveillaud, E.; Gay, P. Bovine tuberculosis in France in 2014: A stable situation. *Bull. Epidémiol. Anim. Health Nutr.* 2015, 71, 4–11.
100. Menge, C.; Köhler, H.; Moser, I.; Conraths, F.J.; Homeier, T. Nationwide cross-sectional study on bovine tuberculosis by intra vitam testing in Germany, 2013–2014. *Transbound. Emerg. Dis.* 2017, 64, 1236–1242.
101. Agence Française de Sécurité Sanitaire des Aliments. Avis de l'Agence Française de Sécurité Sanitaire des Aliments Relatif au Projet d'Arrêté Modifiant l'arrêté du 15 Septembre 2003 Fixant les Mesures Techniques et Administratives Relatives à la Prophylaxie Collective et à la Police Sanitaire de la Tuberculose des Bovinés et des Caprins; Saisine n. 2009-SA-0300; Agence Française de Sécurité Sanitaire des Aliments; Maisons-Alfort, France, 2010.
102. Agence Française de Sécurité Sanitaire des Aliments. Avis de l'Agence Française de Sécurité Sanitaire des Aliments Relatif à l'évaluation du Risque lié à la Consommation de Viandes Porcines Contaminées par *Mycobacterium* spp. et en Particulier par *Mycobacterium Avium* et l'adaptation du Système d'Inspection en Abattoir; Saisine n. 2009-SA-0300; Agence Française de Sécurité Sanitaire des Aliments; Maisons-Alfort, France, 2009.
103. European Food Safety Authority; European Centre for Disease Prevention and Control. The European Union Summary Report on Trends and Sources of Zoonoses, Zoonotic Agents and Food-borne Outbreaks in 2012. *EFSA J.* 2014, 12, 3547.
104. European Food Safety Authority; European Centre for Disease Prevention and Control. The European Union Summary Report on Trends and Sources of Zoonoses, Zoonotic Agents and Food-borne Outbreaks in 2013. *EFSA J.* 2015, 13, 3991.
105. European Food Safety Authority; European Centre for Disease Prevention and Control. The European Union Summary Report on Trends and Sources of Zoonoses, Zoonotic Agents and Food-borne Outbreaks in 2014. *EFSA J.* 2015, 13, 4329.
106. Réveillaud, É.; Desvaux, S.; Boschioli, M.L.; Hars, J.; Faure, É.; Fediaevsky, A.; Cavalerie, L.; Chevalier, F.; Jabert, P.; Poliak, S.; et al. Infection of wildlife by *Mycobacterium bovis* in France assessment through a national surveillance system, *Sylvatub*. *Front. Vet. Sci.* 2018, 5, 262.

107. Fink, M.; Schleicher, C.; Gonano, M.; Proding, W.M.; Pacciarini, M.; Glawischnig, W.; Ryser-Degiorgis, M.P.; Walzer, C.; Stalder, G.L.; Lombardo, D.; et al. Red deer as maintenance host for bovine tuberculosis, Alpine region. *Emerg. Infect. Dis.* 2015, 21, 464.
108. Moser, I.; Schettler, E.; Hotzel, H.; Herzog, S.; Frölich, K. Mycobacterial infections in free-living cervids in Germany (2002–2006). *J. Wildl. Dis.* 2011, 47, 999–1004.
109. INSEE. *Statistics Agricoles*. Available online: <https://www.insee.fr/fr/accueil> (accessed on 15 December 2017).
110. Griffin, J.F.T.; Mackintosh, C.G. Tuberculosis in deer: Perceptions, problems and progress. *Vet. J.* 2000, 160, 202–219.
111. ONCFS. *Tableaux de Chasse Par Département. Réseau "Ongulés Sauvages ONCFS/FNC/FDC"*. Available online: [www.oncfs.gouv.fr/Grands-ongules-Tableaux-de-chasse-ru248/Grands-ongules-Tableaux-de-chasse-departementaux-ar1480](http://www.oncfs.gouv.fr/Grands-ongules-Tableaux-de-chasse-ru248/Grands-ongules-Tableaux-de-chasse-departementaux-ar1480) (accessed on 27 November 2018).
112. Statista. *Jahresstrecken von Schwarzwild (Wildschweine) in Deutschland von 1997/98 bis 2015/16*. Available online: <https://de.statista.com/statistik/daten/studie/157728/umfrage/jahresstrecken-von-schwarzwild-in-deutschland-seit-1997-98/> (accessed on 15 December 2017).
113. Maillard, D.; Gaillard, J.M.; Hewison, M.; Ballon, P.; Duncan, P.; Loison, A.; Toïgo, C.; Baubet, E.; Bonenfant, C.; Garel, M.; et al. Ungulates and their management in France. In *European Ungulates and Their Management in the 21st Century*; Apollonio, M., Andersen, R., Putman, R., Eds.; Cambridge University Press: Cambridge, UK, 2010.
114. Wotschikowski, U. Ungulates and their management in Germany. In *European Ungulates and Their Management in the 21st Century*; Apollonio, M., Andersen, R., Putman, R., Eds.; Cambridge University Press: Cambridge, UK, 2010.
115. ANSES. *Tuberculose Bovine et Faune Sauvage. Rapport Scientifique*. Available online: <https://www.anses.fr/fr/system/files/SANT2010sa0154Ra.pdf> (accessed on 12 December 2018).
116. Rigaux, P.; Chanu, C. Densité du blaireau d'Eurasie (*Meles meles*) et répartition des terriers dans un paysage rural du Massif Central (Puy-de-Dôme, France). *Rev. Ecol.* 2012, 67, 339–347.
117. Keuling, O.; Greiser, G.; Grauer, A.; Strauß, E.; Bartel-Steinbach, M.; Klein, R.; Wenzelides, L.; Winter, A. The German wildlife information system (WILD): Population densities and den use of red foxes (*Vulpes vulpes*) and badgers (*Meles meles*) during 2003–2007 in Germany. *Eur. J. Wildl. Res.* 2011, 57, 95–105.
118. C. Sanz. Programa de Erradicación de Tuberculosis Caprina en la Comunidad Autónoma de Extremadura; VIII Foro Nacional del Caprino, Servicio de Sanidad Animal, Junta de Extremadura; 2017. Available online: <https://www.cabrandalucia.com/inicio/foro-nacional-caprino/viii-foro-nacional-del-caprino> (accessed on 12 December 2018).
119. Gortázar, C.; Fernández-Calle, L.M.; Collazos-Martínez, J.A.; Mínguez-González, O.; Acevedo, P. Animal tuberculosis maintenance at low abundance of suitable wildlife reservoir hosts: A case study in northern Spain. *Prev. Vet. Med.* 2017, 146, 150–157.
120. Fernández-de-Mera, I.G.; Vicente, J.; Höfle, U.; Ruiz-Fons, F.; Ortiz, J.A.; Gortázar, C. Factors affecting red deer skin test responsiveness to bovine and avian tuberculin and to phytohaemagglutinin. *Prev. Vet. Med.* 2009, 90, 119–126.
121. Vicente, J.; Barasona, J.A.; Acevedo, P.; Ruiz-Fons, J.F.; Boadella, M.; Díez-Delgado, I.; Beltran-Beck, B.; González-Barrio, D.; Queirós, J.; Montoro, V.; et al. Temporal trend of tuberculosis in wild ungulates from Mediterranean Spain. *Transbound. Emerg. Dis.* 2013, 60, 92–103.
122. García-Jiménez, W.L.; Fernández-Llario, P.; Benítez-Medina, J.M.; Cerrato, R.; Cuesta, J.; García-Sánchez, A.; Gonçalves, P.; Martínez, R.; Risco, D.; Salguero, F.J.; et al. Reducing Eurasian wild boar (*Sus scrofa*) population density as a measure for bovine tuberculosis control: Effects in wild boar and a sympatric fallow deer (*Dama dama*) population in Central Spain. *Prev. Vet. Med.* 2013, 110, 435–446.
123. García-Bocanegra, I.; de Val, B.P.; Arenas-Montes, A.; Paniagua, J.; Boadella, M.; Gortázar, C.; Arenas, A. Seroprevalence and risk factors associated to *Mycobacterium bovis* in wild artiodactyl species from southern Spain, 2006–2010. *PLoS One* 2012, 7, e34908.
124. De Val, B.P.; Napp, S.; Velarde, R.; Lavín, S.; Cervera, Z.; Singh, M.; Allepuz, A.; Mentaberre, G. Serological follow-up of tuberculosis in a wild boar population in contact with infected cattle. *Transbound. Emerg. Dis.* 2017, 64, 275–283.

125. Santos, N.; Nunes, T.; Fonseca, C.; Vieira-Pinto, M.; Almeida, V.; Gortázar, C.; Correia-Neves, M. Spatial analysis of wildlife tuberculosis based on a serologic survey using dried blood spots, Portugal. *Emerg. Infect. Dis.* 2018, 24, 2169–2175.
126. Madeira, S.; Manteigas, A.; Ribeiro, R.; Otte, J.; Fonseca, A.P.; Caetano, P.; Abernethy, D.; Boinas, F. Factors that influence *Mycobacterium bovis* infection in red deer and wild boar in an epidemiological risk area for tuberculosis of game species in Portugal. *Transbound. Emerg. Dis.* 2015, 64, 793–804.
127. Muñoz-Mendoza, M.; Marreros, N.; Boadella, M.; Gortázar, C.; Menéndez, S.; de Juan, L.; Bezos, J.; Romero, B.; Copano, M.F.; Amado, J.; et al. Wild boar tuberculosis in Iberian Atlantic Spain: A different picture from Mediterranean habitats. *BMC Vet. Res.* 2013, 9, 176.
128. Barasona, J.A.; Mulero-Pázmány, M.; Acevedo, P.; Negro, J.J.; Torres, M.J.; Gortázar, C.; Vicente, J. Unmanned aircraft systems for studying spatial abundance of ungulates: Relevance to spatial epidemiology. *PLoS One* 2014, 9, e115608.
129. Balseiro, A.; Rodríguez, O.; González-Quirós, P.; Merediz, I.; Sevilla, I.A.; Davé, D.; Dalley, D.J.; Lesellier, S.; Chambers, M.A.; Bezos, J.; et al. Infection of Eurasian badgers (*Meles meles*) with *Mycobacterium bovis* and *Mycobacterium avium* complex in Spain. *Vet. J.* 2011, 190, e21–e25.
130. MAGRAMA. Caracterización del Sector Ovino y Caprino en España, año 2016. In Ministerio de Agricultura, Alimentación y Medio Ambiente, Dirección General de Producciones y Mercados Agrarios, Subdirección General de Productos Ganaderos; Technical Report; 2015. Available online: [https://www.mapa.gob.es/es/ganaderia/temas/produccion-y-mercados-ganaderos/caracterizaciondelsectorovino2016\\_def\\_tcm30-380879.pdf](https://www.mapa.gob.es/es/ganaderia/temas/produccion-y-mercados-ganaderos/caracterizaciondelsectorovino2016_def_tcm30-380879.pdf) (accessed on 12 December 2018).
131. Armenteros, J.A.; Barasona, J.Á.; Boadella, M.; Acevedo, P.; Gortázar, C.; Vicente, J. Una propuesta para considerar aspectos sanitarios en la regulación cinegética. *Rev. Ecosist.* 2013, 22, 54–60.
132. MAGRAMA. Anuarios de Estadística Forestal. Available online: [https://www.miteco.gob.es/es/biodiversidad/estadisticas/5016%20Estad%20C3%ADstica%20Anual%20de%20Caza\\_METODOLOG%20C3%8DA\\_tcm30-196241.pdf](https://www.miteco.gob.es/es/biodiversidad/estadisticas/5016%20Estad%20C3%ADstica%20Anual%20de%20Caza_METODOLOG%20C3%8DA_tcm30-196241.pdf) (accessed on 14 November 2018).
133. ICNF. Hunting Statistics Database Portugal; Instituto de Conservação da Natureza e Biodiversidade: 2016 (accessed on 29 March 2019).
134. Vingada, J.; Fonseca, C.; Cancela, J.; Ferreira, J.; Eira, C. Ungulates and their management in Portugal. In *European Ungulates and Their Management in the 21st Century*; Apollonio, M., Andersen, R., Putman, R., Eds.; Cambridge University Press: Cambridge, UK, 2010.
135. Carranza, J. Ungulates and their management in Spain. In *European Ungulates and Their Management in the 21st Century*; Apollonio, M., Andersen, R., Putman, R., Eds.; Cambridge University Press: Cambridge, UK, 2010.
136. Rosalino, L.M.; Macdonald, D.W.; Santos-Reis, M. Spatial structure and land-cover use in a low-density Mediterranean population of Eurasian badgers. *Canad. J. Zool.* 2004, 82, 1493–1502.
137. Revilla, E.; Delibes, M.; Travaini, A.; Palomares, F. Physical and population parameters of Eurasian badgers (*Meles meles* L.) from Mediterranean Spain. *Z. Säugetierkd.* 1999, 64, 269–276.
138. Acevedo, P.; González-Quirós, P.; Prieto, J.M.; Etherington, T.R.; Gortázar, C.; Balseiro, A. Generalizing and transferring spatial models: A case study to predict Eurasian badger abundance in Atlantic Spain. *Ecol. Model.* 2014, 275, 1–8.
139. EEA. Biogeographical Regions of Europe. Council of Europe (CoE), Directorate-General for Environment (DG ENV), European Environmental Agency. Available online: [www.eea.europa.eu/legal/copyright](http://www.eea.europa.eu/legal/copyright) (accessed on 15 December 2017).
